# Supplementary material
Source: MDPI journal article supplement (https://www.mdpi.com/2673-5318/2/3/19)
Supplement: s1 [file s1 › psychiatryint-1236986-supplementary.pdf]

**Supplement Table S1:** Overnight PSG's compared (n=43): sleep movement parameters

|                                       | Night 1       | Variability (%) | Night 2       | Variability (%) | t-test dependent samples(12) | p-value |
|---------------------------------------|---------------|-----------------|---------------|-----------------|------------------------------|---------|
| <b>PLMS index, n/hr</b>               | 17.8 ± 32.5   | 182.1           | 26.1 ± 39.9   | 153.0           | -3.0                         | 0.005   |
| <b>PLMS, n</b>                        | 111.7 ± 258.0 | 231.0           | 171.3 ± 305.6 | 178.4           | -3.3                         | 0.002   |
| <b>PLMS micro-arousal index, n/hr</b> | 2.3 ± 3.2     | 139.8           | 3.2 ± 4.4     | 140.0           | -1.5                         | 0.135   |
| <b>PLMS average interval, s</b>       | 31.6 ± 15.1   | 47.7            | 30.1 ± 16.2   | 53.9            | 0.6                          | 0.576   |
| <b>PLMW index, n/hr</b>               | 2.5 ± 8.4     | 334.4           | 2.2 ± 4.9     | 222.4           | 0.2                          | 0.830   |
| <b>PLMW, n</b>                        | 2.8 ± 10.8    | 386.8           | 2.0 ± 3.4     | 172.2           | 0.5                          | 0.651   |
| <b>PLMW average interval, s</b>       | 8.1 ± 19.1    | 235.3           | 11.3 ± 23.7   | 210.3           | -0.7                         | 0.482   |
| <b>PLMS series TST,%</b>              | 10.9 ± 14.7   | 134.8           | 16.6 ± 19.6   | 118.2           | -2.7                         | 0.011   |
| <b>PLMS series N1,%</b>               | 10.5 ± 13.8   | 131.7           | 15.9 ± 17.5   | 110.2           | -2.8                         | 0.007   |
| <b>PLMS series N2,%</b>               | 11.9 ± 16.6   | 139.4           | 18.6 ± 23.3   | 124.9           | -2.6                         | 0.014   |
| <b>PLMS series N3,%</b>               | 3.4 ± 12.1    | 351.9           | 1.6 ± 6.1     | 377.3           | 0.9                          | 0.353   |
| <b>PLMS series REM,%</b>              | 3.6 ± 9.8     | 271.0           | 6.2 ± 13.5    | 219.4           | -1.6                         | 0.118   |

Based on the adjusted p-value of  $\leq 0.001$  in bold are the significant results. Data are presented as mean $\pm$ SD unless otherwise indicated. The variability is expressing the dispersion of the measure (%). **PLMS** = periodic limb movements during sleep; **PLMS series**: percentage of the different sleep stages associated with PLM; **PLMW**= periodic leg movements during wakefulness; **TST**=total sleep time; **N1-N3**: sleep stage; **REM**: rapid eye movement sleep

**Supplement Table S2:** Standard sleep study parameters of the clusters

|                                          | <b>Total</b><br>(n=33) | <b>Cluster 1</b><br>(n=17) | <b>Cluster 2</b><br>(n=16) | <b>Mann-Whitney U test</b> | <b>p-value</b> |
|------------------------------------------|------------------------|----------------------------|----------------------------|----------------------------|----------------|
| <b>Age, years</b>                        | 57.9±15.8              | 62.3±16.1                  | 53.3±14.5                  | 1.6                        | 0.101          |
| <b>Male/female, n</b>                    | 22/11                  | 13/4                       | 9/7                        | $\chi^2(1)=1.5$            | 0.218          |
| <b>Total sleep time, min.</b>            | 379.6±107.4            | 410.6±121.8                | 346.7±81.0                 | 1.7                        | 0.087          |
| <b>Sleep efficiency, %</b>               | 75.8±15.2              | 79.0±15.6                  | 72.4±14.6                  | 1.5                        | 0.145          |
| <b>Sleep quality, %</b>                  | 16.8±8.7               | 13.7 ± 8.1                 | 20.1±8.3                   | -2.0                       | 0.042          |
| <b>Sleep latency, min.</b>               | 24.4±24.7              | 22.7 ±26.5                 | 26.1±23.4                  | -0.8                       | 0.428          |
| <b>REM sleep latency, min.</b>           | 125.9±94.1             | 117.7±100.7                | 141.0±87.2                 | -1.4                       | 0.177          |
| <b>Wake after sleep onset, min.</b>      | 75.4±59.2              | 59.0±55.6                  | 92.9±59.6                  | -2.3                       | 0.024          |
| <b>Arousals, n</b>                       | 92.2±69.6              | 110.1±89.0                 | 73.1±33.7                  | 0.8                        | 0.449          |
| <b>Stage N1, %</b>                       | 22.6±13.9              | 23.0±12.5                  | 22.1±15.6                  | 0.4                        | 0.679          |
| <b>Stage N2, %</b>                       | 60.7±12.8              | 63.3±13.5                  | 57.9±11.8                  | 1.3                        | 0.189          |
| <b>Stage N3, %</b>                       | 3.4±4.9                | 2.0±3.6                    | 5.0±5.7                    | -1.9                       | 0.051          |
| <b>REM, %</b>                            | 13.3±5.7               | 11.6±5.8                   | 15.1±5.3                   | -1.8                       | 0.075          |
| <b>Total AHI, n/hr</b>                   | 17.9±17.4              | 19.0±16.7                  | 16.8±18.5                  | 0.4                        | 0.679‡         |
| <b>Snore index, /hr</b>                  | 11.8±26.8              | 16.5±30.4                  | 6.8±22.2                   | 1.4                        | 0.165          |
| <b>O<sub>2</sub> saturation nadir, %</b> | 93.3±1.6               | 93.5±1.5                   | 93.1±1.7                   | 0.3                        | 0.787          |
| <b>PLMS index, n/hr</b>                  | 13.1±14.0              | 20.1±16.0                  | 5.6±5.4                    | 2.9                        | 0.004‡         |
| <b>PLMS, n</b>                           | 71.2±78.4              | 113.4±88.3                 | 26.4±25.4                  | 2.8                        | 0.005‡         |
| <b>PLMS micro-arousal index, n/hr</b>    | 1.8±2.6                | 2.9±3.2                    | 0.7±1.2                    | 2.5                        | 0.014‡         |
| <b>PLMS average interval, s</b>          | 31.8±15.4              | 32.6±14.3                  | 30.9±16.9                  | 0.2                        | 0.815          |
| <b>PLMW index, n/hr</b>                  | 1.6±4.4                | 2.6±5.9                    | 0.6±1.8                    | 1.0                        | 0.341          |
| <b>PLMW, n</b>                           | 1.4±2.8                | 1.8±3.1                    | 1.0±2.5                    | 0.7                        | 0.465          |
| <b>PLMW average interval, s</b>          | 7.4±16.3               | 9.1±17.2                   | 5.6±15.7                   | 0.7                        | 0.503          |
| <b>PLMS series TST, %</b>                | 9.2±16.3               | 14.4±11.5                  | 3.7±3.5                    | 2.9                        | 0.004‡         |
| <b>PLMS series N1, %</b>                 | 8.1±8.1                | 13.0±8.3                   | 2.8±3.3                    | 3.5                        | <b>0.0000‡</b> |
| <b>PLMS series N2, %</b>                 | 10.3±12.3              | 15.7±14.7                  | 4.5±5.0                    | 2.3                        | 0.021          |
| <b>PLMS series N3, %</b>                 | 4.5±13.7               | 6.0±17.7                   | 2.9±7.9                    | 0.4                        | 0.665          |
| <b>PLMS series REM, %</b>                | 2.1±5.0                | 2.9±4.7                    | 1.3±5.3                    | 2.1                        | 0.037          |

In bold the significant results based on the adjusted p-value of  $\leq 0.001$ . ‡ per Mann-Whitney U test, in contrast to the previous Cluster analysis, same result. Data are presented as mean  $\pm$  SD unless otherwise indicated. **AHI** = apnea-hypopnea index; **N1-N3**: sleep stage % of total sleep time; **PLMS** = periodic limb movements during sleep; **PLMS series**: percentage of the different sleep stages associated with PLM; **PLMW**= periodic leg movements during wakefulness; **REM**: rapid eye movement sleep; **TST**= total sleep time; **WASO** = wake after sleep onset.

**Supplement Table S3:** Overview of the samples investigated

| Sample size                     | n = 43 (all G25.81/333.94)                                                                                                                             |                                                                                 |                                                                                                         |
|---------------------------------|--------------------------------------------------------------------------------------------------------------------------------------------------------|---------------------------------------------------------------------------------|---------------------------------------------------------------------------------------------------------|
| Sample size in cluster analysis | n = 33 (excluding F41.2/309.28 as outlier)                                                                                                             |                                                                                 | Not in cluster analysis<br>(n = 9)                                                                      |
| Groups                          | Cluster 1                                                                                                                                              | Cluster 2                                                                       |                                                                                                         |
| ICD-10 diagnoses                | F20+F33 (n=1); F31.2 (n=1); F33 (n=9); F33+F60.9 (n=1); F41.1 (n=3); F41.2 (n=2)                                                                       | F31.2+F41.1+F60.9 (n=1); F33+F41.1 (n=2); F41.1 (n=4); F41.2 (n=8); F60.9 (n=1) | F31.2 (n=1); F31.2+F60.9 (n=1); F33 (n=1); F33+F60.9 (n=1); F41.1 (n=2); F41.1+F60.9 (n=1); F41.2 (n=2) |
| DSM-5 diagnosis                 | 295.9; 296.31; 296.44; 300.02; 301.9; 309.28 and combinations                                                                                          | 300.02; 301.9; 309.28 and combinations                                          | 296.31; 296.44; 300.02; 309.28 and combinations                                                         |
| Medication*                     | Alprazolam; Clomipramine; L-Dopa; Levothyroxine; Parkinane; Pramipexol; Risperidone; Sertraline; Silodosine; Solian; Telmisartan; Trazodone; Zopiclone | Effexor; Lexomil; Loxapine; Mirtazapine                                         | Clomipramine; Clozapine; Cyamemazine; Effexor; Lamotrigine; Pramipexol; Quetiapine; Zopiclone           |

(+) = dual diagnosis, primary + secondary ; \*several patients are on multidrug treatments

**Supplement Figure S1:** Flowchart of patients included in our study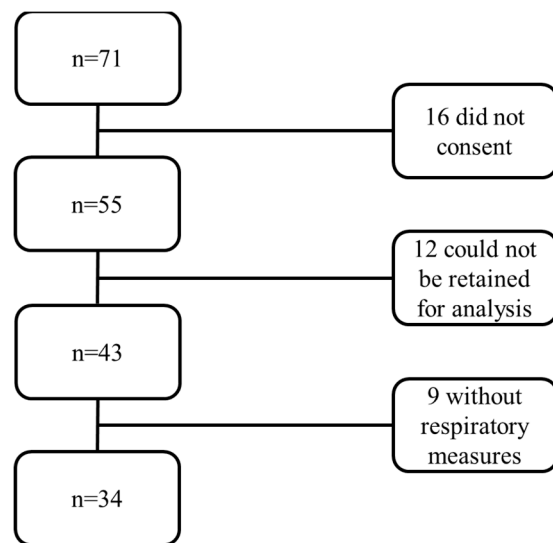

We started with the retrospective collection of sleep data that was consented by a population with newly diagnosed RLS at the time of their sleep recording. This sample is 55 subjects. Data of 12 subjects could not be used.

The sleep data (between 2016 to 2019) of newly diagnosed RLS subjects of whom the sleep study was performed at the time of diagnosis, was collected by the authors in a psychiatric setting, in contrast to data collected from a psychiatric patient attending a sleep clinic. We also extracted the psychiatric diagnosis, somatic condition and medication information available at the time of PSG. This was done for 55 consented records, of which 43 subjects remained for further analysis.

Next, we analyzed the available sleep data from a sleep perspective:

1. The standard clinical approach: Associative risk of sleep disordered breathing and RLS; PLM were scored in several ways per WASM guidelines. This was done for 43 subjects, except that respiratory assessment was only available in 34.

The impact of this missing data is analyzed separately. Because we had two nights of sleep recording available, we opted for the most complete dataset.

2. The datamining approach with cluster analysis: In the statistical analysis of step 1, the relationships between the psychiatric state, a comorbid somatic issue or medication is not considered. However in step 2, the data mining approach, these relationships are considered. Datamining was done on the 34 subjects, except here 1 subject was an outlier for which cluster analysis is sensitive and hence the subject was excluded. The significant sleep variables from approach 1 were used in step 2, showing significant differences between two 'datamined' subgroups.

Lastly, because this is a retrospective analysis of clinical data, we performed several post hoc analysis (i.e. the sensitivity analysis) to test the robustness of our statistical outcomes.

Dashed line denotes the PLMS cut-off of 15, and the AHI cut-off of 5, as reference lines.
